# Supplementary material
Source: Frontiers journal article supplement (https://www.frontiersin.org/articles/466674)
Supplement: Data_Sheet_1.docx [file Data_Sheet_1.docx]

Supplementary Data

*Overview of ecosystem models.*

Ecopath with Ecosim (EwE) and Atlantis are widely used modelling frameworks that have been developed and implemented over the past 20-35 years (20 years for Atlantis, 35 for EwE). InVitro has seen more limited use, but models exist for the Pilbara and Gascoyne regions of Western Australia. Details on the content of each model can be found in Table 1 (main text) and Table S1.

EwE comprises three modules:

1. *Ecopath*: which describes the static energy (or biomass) flow through a food web at a particular point in time (i.e. a trophic input-output analysis);
2. *Ecosim*: which projects the trophic dynamics through time allowing for the forecasting of ecosystem responses to environmental perturbations and fishing (it can also include habitat dependency which was used in the ECE analysis as described below and in the main paper); and
3. *Ecospace*: which projects the food web through time over a two-dimensional spatial representation of the ecosystem (Christensen & Walters 2004).

The ecological theory and mathematical equations underpinning EwE have been extensively detailed previously (Walters et al. 1997; Christensen and Walters 2004). The models used in the work described here was done using Ecosim. While some of the model domains do have Ecopace models it was not possible to easily force these spatial models with an ECE in the available version of the software (version 6.5).

Atlantis is an end-to-end (or whole-of-system) that dynamically tracks nutrient flow through food webs that are driven by environmental conditions and influenced by anthropogenic activities – primarily fisheries and aquaculture, but simple representations of other coastal and oceanic uses can also be included (including terrestrial run-off). Atlantis is 3D spatially-explicit and dynamically integrates processes represented in physical, biogeochemical, ecological and human use sub-models. The Atlantis maps are made up of user defined boxes and depth layers that are defined based on major bathymetric, ecological and jurisdictional break points in the system of interest. Each box is resolved into a layered water column, a 2D epibenthic habitat and a layered slab of sediment. Most biogeochemical, biological or fisheries processes are replicated in each cell (though based on the nature of the process they may be restricted to the water column, epibenthic or sediment layer(s)). Details of the ecological theory, operational aspects, and the mathematical equations that underpin the key functions of Atlantis have also been extensively detailed previously (Fulton et al. 2007; Link et al. 2010; Kaplan et al. 2012; Audzijonyte et al. 2017). The Atlantis model applied to South East Australia has multiple plausible parameterisations (all run here under the various ECE scenarios) and it also has an extension which allows for a rudimentary representation of acclimation and evolution under climate drivers (as outlined in Fulton and Gorton 2014), this model variant was applied in parallel with the version with this functionality turned off to give a first impression of what potential ameliorating effects these processes may have on ecosystem outcomes.

The final model type used was InVitro, which is a full agent-based representation of the ecosystem (Gray *et al* 2006). The Ningaloo model was developed for the Gascoyne region in support of multiple used management and planning for the region (Fulton et al 2011). InVitro includes a simplified representation of the foodweb – focusing on iconic species in the region (turtles, lobsters, seabirds, dugongs, whalesharks and whales), key fish and invertebrate species (e.g. commercially caught prawns) populating the coastal waters and benthic biogenic habitats. The model represents the key ecological processes in the region (interpolated onto the grid used to represent the oceanography and habitats) as well as the major industries – fisheries (commercial and recreational), aquaculture, ports, tourism, offshore energy extraction and coastal activities – such as mining, agriculture, urban developments and infrastructure (Gray *et al* 2013). InVitro is stochastic and has multipole plausible parametrisations, 100 instances of each parameterisation here was run to produce the overall set of results for this model. Previous work with the model has shown this is sufficient to represent the breadth of variation in results possible.

References

Audzijonyte, A., Gorton, R., Kaplan, I.C., and Fulton, E.A. (2017) Atlantis User’s Guide Part I: General Overview, Physics & Ecology. CSIRO.

Christensen, V., and Walters, C.J. (2004) Ecopath with Ecosim: methods, capabilities and limitations. *Ecological Modelling* 172(2-4), 109-139.

Fulton, E.A., Smith, A.D.M. and Smith, D.C., 2007. *Alternative Management Strategies for Southeast Australian Commonwealth Fisheries: Stage 2: Quantitative Management Strategy Evaluation*. Australian Fisheries Management Authority Report. Canberra. 378pp

Fulton, E.A., Johnson P. and Gorton R., 2012. SE Fisheries & Climate Simulations: Barriers to Adaptation. 2010/023 - Quantitative testing of fisheries management arrangements under climate change using Atlantis: Milestone Report Appendix 3. CSIRO, Australia

Gray, R., Fulton, E.A., Little, L.R. and Scott, R., 2006. Operating Model Specification Within an Agent Based Framework. North West Shelf Joint Environmental Management Study Technical Report – Vol 16, CSIRO, Hobart, Tasmania

Kaplan, I.C., Horne, P.J., and Levin, P.S. (2012) Screening California Current fishery management scenarios using the Atlantis end-to-end ecosystem model. *Progress in Oceanography* 102, 5-18.

Walters, C., Christensen, V., and Pauly, D. (1997) Structuring dynamic models of exploited ecosystems from trophic mass-balance assessments. *Reviews in Fish Biology and Fisheries* 7(2), 139-172.

Table S1: The biophysical/ecological and anthropogenic components of each of the models uses in the ECE analysis. NSW = New South Wales.

| Model | Environmental Drivers | Biophysical and Ecological Model Components | Anthropogenic Components |
| --- | --- | --- | --- |
| Jurien Bay (EwE) | ECE forcing time sereis | Dolphins  Sea lions  Intertidal birds  Surface diving birds  Large coastal sharks  Small coastal sharks  Rays  Dhufish  Pink snapper  Baldchin grouper  King wrasse  Western foxfish  Breaksea cod  Rabbit fish  Inshore reef ass. herbivore  Inshore reef ass. omnivore  Inshore reef ass. zoobenthos feed.  Inshore ass. carnivore  Inshore sand ass. omnivore  Inshore seagrass ass. omnivore  Inshore seagrass ass. zoob. feed.  Inshore benthopelagic carnivore  Inshore pelagic zooplankton feed  NDR reef ass. herbivore  NDR reef ass. omnivore  NDR reef ass. carnivore  NDR reef ass. zoobenthos feed.  NDR reef aa. zooplankton feed  NDR sand ass. omnivore  NDR sand ass. carnivore  NDR sand ass. zoobenthos feed.  NDR seagrass ass. omnivore  NDR seagrass ass. carnivore  NDR benthopelagic carnivore  NDR pelagic zooplankton Feed.  Sessile epibenthos  Photo. corals/sponges  Infauna  Infaunal bivalves  Sessile bivalves  Deposit feed. invert.  Small mobil epifauna  Small mobile herbivores  Large mobile herb. invert.  Large mobile carn. invert.  Large Crabs  Cuttlefish  Squid  Octopus  Lobster-post puerulus  Lobster- Juvenile  Lobster - Adolescent  Lobster Adult  Small Gastropods  Large Carn. Gastropods  Large Herb. Gastropods  Sea turtles  Roe abalone  Small Zooplankton  Large Zooplankton  Chaetognaths  Carnivorous Jellyfish  Microbial heterotrophs  Ecklonia  Sargassum  Low algae  Turfs  Corraline algae  Ephemeral seagrasses  Perenial seagrasses  Seagrass epiphytes  Microphytobenthos  Small Phytoplankton  Large Phytoplankton  Detached seagrass  Detached brown algae  Detached algae other  Dead Carcasses  Bait  Water colum detritus  Detritus | Rock lobster fleet  Beach Seine  Droplinning  Gill Netting  Handlinning  Longlinning  Traps  Abalone  Rec. Pots  Rec. Beach Anglers  Rec. Boat Anglers  Rec. Netting  Rec. Diving  Rec. Spearfishing |
| Ningaloo (EwE) | ECE time series | Foxes  Marsupial grazers  Goats and sheep  Ospreys  Coastal seabird  Shallow demersal fish  Trevallies  Mackerels  Queenfish  Dolphins  Demersal sharks  Pelagic sharks  Whales  Whale sharks  Manta Rays  Adult Turtles  Hatchlings  Dugongs  Lethrinids adults  Lethrinids juv  L nebulosus adult  L nebulosus juv  Small lutjanids  Serranids  Tuskfish  Saurids  Nemipterids  Herbivores  Small reef fish  Tuna and billfish  Reef Associated Pelagics  Small pelagics  Squid  Octopus  Kingprawn  Bananaprawn  Lobster  Crabs  Shells  Urchins  Benthos  Lg Coral  Sm Coral  Coral Spawn  Zooplankton  Buffell grass  Native grass  Macrophytes  Phytoplankton  Litter  Discards  Detritus | Whale shark tours  Snorkelling  Tourism  Agriculture  Camping  Oil and Gas  Recreational fishing  Commercial  Prawn trawl |
| Ningaloo (InVitro) | Temperature  Salinity  Currents  Precipitation  ECE time series (and footprint) | Macroalgae  Seagrass  Corals  Mangroves  Terrestrial vegetation  Phytoplankton  Zooplankton  Whale sharks  Dugong  Dolphins  Whales  Seabirds  Osprey  Ungulates  Macropods  Banana prawns  King prawns  Urchins  Crabs  Other benthos  Turtles  Small reef fish  Tusk fish  *Lethrinus nebulosus*  Other lethrinids  Large lutjanids  Small lutjanids  Serranids  Nemipterids  Small demersal fish  Other ground fish  Lobsters  Small pelagics  Reef associated pelagics  Mackerel  Queenfish  Trevallies  Tuna and bill fish  Octopus  Squid  Pelagic sharks  Demersal sharks  Manta rays | Local settlements (urban areas of Coral Bay, Carnarvon and Exmouth)  Tourism  Trucking industry  Oil and gas industry (rigs)  Shipping  Recreational fishers  Charter boats (fishing)  Commercial fisheries (prawn and finfish)  Agricultural stations  National park |
| North West Shelf (EwE) | ECE time series | Coastal sharks  Rays  SmTunas  ShLethrinids  RedEmperor  ShLutjanids  ShNemipterirds  DpNemipterids  ShSerranids  FryPBream  JuvCarangids  AdCarangids  SmallPelagics  ShLizard  DpLizard  ShMullidae  DpMullidae  ShTriggerFish  ShSweetlip  DpPonyfish  ShSmFish  DpSmFish  ShMedFish  DpMedFish  ShLgFish  DpLgFish  SessEpibenthos  Megabenthos  Macrofauna  ComPrawns  Squid  LgZooplankton  SmZooplankton  PelPhytoplankton  BenPhytoplankton  Microphytobenthos  Detritus | Domestic trawl  Domestic trap  Prawn  Foreign trawl  Longline |
| Kimberley (EwE) | ECE time series | Humpback whale  Snubfin dolphin  Dolphins  Dugong  Coastal seabirds  Migratory shorebirds  Emperors adults  Emperors juv.  Snappers  Adult barramundi  Juvenile barramundi  Billfishes and Tunas  Threadfin  Spanish Mackerel  Pelagic sharks  Demersal sharks  Rays  Lizarfish  Large Reef Fish  Small Reef Fish  reef associated pelagics  Shallow Demersal Fish  Pelagic fish  Deep demersal fish  Planktivore fish  Herbivorous fish  Estuarine Fish  Green sea turtle  Marine turtles  Turtle hatchlings  Sea snakes  Adult crocodile  Juvenile crocodile  Cane toad  Hard corals  Soft corals  Banana prawn  other prawns  Squids  Molluscs non shelled  Tunicates  Gastropods  Echinoderms  Echinoids  Mud crab  Crabs  Sea cucumbers  Sponges  Epibenthos  Infauna  Bivalves  Salps and jellyfish  Zooplankton  Phytoplankton  Macrophytes  Seagrass  Mangroves  Detritus | Kimberley Prawn Managed Fishery  Kimberley Gillnet and Barramundi Managed Fishery  Broome prawn Managed Fishery  Mackerel Fishery  Northern Demersal Scalefish  Specimen Shell Managed Fishery  Trochus (T. niloticus)  Marine Aquarium fish  Pearl Oyster  Beche-de-mer  Recreational fishing  Tourism pollution  Oil & Gas pollution  Shipping  Habitat deterioration |
| Gulf of Carpentaria (EwE) | ECE time series | Dolphins  Dugongs  Turtles  Sea snakes  Sea birds  Large sharks  Small sharks  Sawfishes  Rays  Pelagic carnivores Fish  Pelagic invert feeders Fish  Benthopelagic carnivores Fish  Benthopelagic invert feeders Fish  Benthic carnivores Fish  Benthic invert feeders Fish  Red snappers Fish  Reef assoc. carnivores Fish  Reef assoc. invert feeders Fish  Reef assoc. herbivores Fish  Detritivores Fish  Cephalopods  Stomatopods  Banana prawn juv  Banana prawn adult  Tiger prawn juv  Tiger prawn adult  Other commercial prawns  Thallasinid prawns  Other non-commercial prawns  Lobsters  Mud crab  Sand crab and other large crabs  Large gastropod carnivore  Holothurians  Spatangoids  Echinoids  Ophiuroids  Asteriods  Sessile epibenthos  Bivalves  Small crustaceans  Annelids detrit / carn  Small gastropod omni / Small gastropod carn  Infaunal detrit / carn  Zooplankton  Microbial heterotrophs  Foraminifera  Phytoplankton  Microphytobenthos  Seagrass  Macroalgae  Discards  Detritus | Banana prawn fishery  Tiger prawn fishery  Inshore net (Barrra)  Offshore net (Shark and mackerel)  IUU (Shark)  Line (Spanish mackerel)  Fish trawl (Red snapper)  Pot (Mud crab)  Charter  Recreational  Aboriginal |
| Great Barrier Reef (EwE) | ECE time series | Barramundi  Juv Mangrove Jack  Sea birds  Large sharks/rays  Inshore Finfish  Large groupers  Adult Mangrove Jack  Cephalopods  Scombrids/jacks  Large schooling fish  adult small school fish  juv small schooling fish  Coral Trout  Large fish carniv.  Other prawns  P.longistylus  P.esculentus  M.endeavouri  Small fish omniv.  Crustaceans  Sea turtles (large)  Echinoderms  Benthic molluscs/worms  Zooplankton  Sessile animals  Dugong  Fish herbivore  Decomposer/microfauna  Phytoplankton  Benthic autotrophs  Detritus/discards  Detritus | line fish  trawl  inshore gillnet |
| NSW Coast (EwE) | ECE time series | Phytoplankton  Macrophytes  Zooplankton  Gel zooplankton  Inshore squid  S insh ben invert  L insh ben invert  Inshore prawns  Rock Lobsters  Small insh omn fish  Insh dem herb fish  Insh dem omn fish  Insh dem pisc fish  S insh pel pisc fish  S insh pel omn fish  L insh pel pisc fish  L insh pel omn fish  S slope benthic inverts  L slope benthic inverts  Royal red prawns  Antlered and paddle crabs  Offshore squid  Redfish  Pink Ling  Gemfish  Blue Grenadier  Warehou and Trevalla  Trevallies  Tiger flathead  School whiting  Snapper  Morwongs  Dories  Ocean perch  Mesopelagics  Offshore dem omn fish  Offshore dem pisc fish  Deep dem omn fish  Deep dem pisc fish  Offshore pel omn fish  Offshore pel pisc fish  Spiky dogshark  Harrisson and Southern dogshark  Greeneye dogshark  Endeavour dogshark  Other dogsharks  Gummy shark  School shark  Other medium sharks  Large sharks  Skates/rays  Toothed whales  Baleen whales  Aus fur seal  Penguins  Seabirds  Detritus (carcasses/discards) | Estuarine fishery  Inshore Ocean  Offshore Trawl  Trap and Line  Recreational  Lobster fishery |
| NSW Coast (Atlantis) | Temperature  Salinity  Currents  Terrestrial run-off  ECE time series (and footprint) | Pelagic bacteria  Large phytoplankton  Small phytoplankton  Small zooplankton  Mesozooplankton  Large zooplankton  Gelatinous zooplankton  Benthic bacteria  Meiobenthos  Macroalgae  Seagrass  Benthic carnivores  Benthic deposit feeders  Deep filter feeders  Shallow filter feeders  Commercial filter feeders  Benthic grazers  Macrozoobenthos  Commercial macrozoobenthos  Lobsters  Cephalopods  Prawns  Demersal shallow herbivorous  Demersal shallow territorials  Demersal shallow other fish  Pelagic small planktivores  Pelagic large planktivores  Pelagic shallow piscivores  Demersal deep fish  Large oceanic piscivores  Oceanic planktivores  Mesopelagic migratory  Mesopelagic non-migratory  Ocean perch  School whiting  Tiger flathead  Trevallies  Morwongs  Blue Grenadier  Pink ling  Warehous and trevalla  Redfish  Gemfish  Demersal sharks  Grey nurse shark  Pelagic sharks  Dogsharks  Spiky dogshark  Skate and Rays  Pinnipeds  Baleen whales  Dolphins  Orca  Sea birds and Penguins | Shelf trawl  Offshore trawl  Non-trawl |
| SE Australia (EwE) | ECE time series | Toothed whale  Baleen whale  Seal  Seabirds  Penguins  Tuna/billfish  Pelagic sharks  Demersal sharks  Rays  Warehous  Redbait  Redfish  Ling  Dories  Jack mackerel  Jackass morwong  Flathead  Gemfish  ShOceanPerch  Chinaman leatherjacket  Cucumberfish  Whiting  Cardinal  ShSmInvertFeeder  ShSmPredator  ShMedInvertFeeder  ShMedPredator  ShLInvertFeeder  ShLPredator  Blue-eye trevalla  Blue grenadier  SlopeOceanPerch  Deepsea Cod  Oreos  SlopeSmInvertFeeder  SlopeSmPredator  SlopeMInverFeeder  SlopeMPredator  SlopeLInvertFeeder  SlopeLPredator  PelSmInvertFeeder  PelMInvertFeeder  PelMPredator  PelLInvertFeeder  PelLPredator  Mesopelagics  Squid  PelagicPrawns  Macrobenthos  Megabenthos  Polychaeta  Gelatinous nekton  Euphausids  L zooplankton  Sm zooplankton  Primary producers  Benthic producer  Detritus  Discards | Trawl  Non-trawl  Line  NSW trawl  Vic trawl  Scallop  Squid  Trap  Danish Seine  Tuna Longline  Recreational |
| SE Australia (Atlantis) | Temperature  Salinity  Currents  Terrestrial run-off  ECE time series (and footprint) | Large phytoplankton  Small phytoplankton  Small zooplankton  Mesozooplankton  Large zooplankton  Gelatinous zooplankton  Pelagic bacteria  Squid  Sediment bacteria  Carnivorous infauna  Deposit feeders  Deep water filter feeders  Shallow water filter feeders  Scallops  Herbivorous grazers  Deep water megazoobenthos  Shallow water megazoobenthos  Rock lobster  Meiobenthos  Macroalgae  Seagrass  Prawns  Giant crab  Small pelagics  Red bait  Mackerel  Migratory mesopelagics  Non-migratory mesopelagics  School whiting  Shallow water piscivores  Blue warehou  Spotted warehou  Tuna and billfish  Gemfish  Shallow water demersal fish  Flathead  Redfish  Morwong  Ling  Blue grenadier  Blue-eye trevalla  Ribaldo  Orange roughy  Dories and oreos  Cardinalfish  Gummy shark  School shark  Demersal sharks  Pelagic sharks  Dogfish  Gulper sharks  Skates and rays  Seabirds  Seals  Sea lion  Dolphins  Orcas  Baleen whales | Dive  Fin-fish auto-longline  Fin-fish drop line  Fin-fish mesh net  Fin-fish trap  Inshore line  Pots  Recreational  (represented as a tithe)  Scallop dredge  Shark net  Shark longline  Small pelagic state fisheries  Small pelagic Commonwealth fishery  Small pelagic purse seine  Squid jig  Tuna longline  Tuna purse seine  Cephalopod trawl  Crustacean trawl  Prawn trawl  Fin-fish midwater trawl  Squid midwater trawl  Danish seine  General demersal (slope) trawl F  Shelf demersal trawl  Orange roughy trawl  Aggregate mining  Shipping  Energy generation  Coastal development |
| Tasmania (EwE) | ECE time series | Large phytopk  Small phytopk  Gelat zoopk  Large zoopk  Mesopk  Small zoopk  Benth carnivores  Benth Deposit Feeders  Deep Benthic FFeeders  Shallow FFeeders  Urchins  Reef Mesograzers  Abalone  Macro zoobenthos Herb  Macro zoobenthos  Macro zoobenthos Fl  Meiobenthos  Macroalgae  Seagrass  Coastal squid FI  Transitory squid Fl  Octopus  Coast Soft micro Carn Telo  Coast Dem Reef Herb Telo Fl  Coast Sm Dem Reef Plk Telo  Coast Dem Reef Carn Telo Fl  Trans Dem Reef Carn Telo Fl  Shelf Carn Telo Fl  Coast Pisc Fl  Coast Sch Omn Pel Telo Fl  Coast Sch Carn Pel Telo Fl  Oceanic planktivores  Oceanic piscivores  Sm Pel Plk Telo  Sm Pel Carn Telo Fl  Offsh Carn Telo Fl  Mig Mesopelagics  Shelf Assoc Dem Sharks  Offshore Dem Sharks  Pelagic sharks  Skates & rays  Dolphins  Fur seal  Little Peng & Shearw  Sea birds  Discards  Detritus | Rock Lobster Commercial  Rock Lobster Rec  Abalone  Giant Crab  Recreational  Shearwater  Southern Calamary  Reef-associated  Coastal Transitory  Flathead  Arrow squid  Small Pelagics  Shark  Octopus  Coastal Demersal  Offshore fisheries  Pinniped Cull |

Table S2: Summary of relative biomass response (biomass during event / biomass before event) and recovery time for temperate and tropical systems for major classes of functional groups for single ECE pulse.

| Ecosystem type | Functional group type | Range of relative biomass | Median of relative biomass | Range of recovery times | Median recovery time |
| --- | --- | --- | --- | --- | --- |
| Temperate | Charismatic megafauna | 0.61 – 1.60 | 1.01 | 1 – 60 | 12.5 |
|  | Detritus | 0.90 – 1.14 | 0.40 | 1 – 10 | 1 |
|  | Fish – habitat dependent | 0.26 – 1.33 | 0.89 | 2 – 22 | 10 |
|  | Fish – other | 0.61 – 1.95 | 1.02 | 1 – 45 | 8.5 |
|  | Habitats | 0.00 – 1.62 | 0.97 | 2 – 23 | 4 |
|  | Invertebrates – habitat dependent | 0.43 – 1.21 | 0.96 | 1 – 18 | 9 |
|  | Invertebrates – other | 0.57 – 1.43 | 1.00 | 1 – 18 | 9 |
|  | Plankton | 0.70 – 1.19 | 0.99 | 1 – 9 | 1 |
|  | Primary producers | 0.00 – 1.33 | 1.09 | 1 – 12 | 8 |
|  | Target (of fisheries) – habitat dependent | 0.37 – 3.43 | 0.82 | 1 – 27 | 10 |
|  | Target (of fisheries) – other | 0.65 – 1.59 | 0.98 | 1 – 29 | 13 |
| Tropical | Charismatic megafauna | 0.02 – 1.20 | 1.01 | 5 – 60 | 22 |
|  | Detritus | 0.98 – 1.04 | 0.99 | 1 – 50 | 3 |
|  | Fish – habitat dependent | 0.75 – 2.11 | 1.01 | 5 – 55 | 13 |
|  | Fish – other | 0.00 – 1.54 | 1.01 | 3 – 26 | 6 |
|  | Habitats | 0.66 – 1.04 | 0.99 | 1 – 35 | 10 |
|  | Invertebrates – habitat dependent | 0.00 – 1.06 | 0.98 | 2 – 32 | 8 |
|  | Invertebrates – other | 0.47 – 1.25 | 0.99 | 2 – 27 | 7 |
|  | Plankton | 0.86 – 1.08 | 1.01 | 1 – 6 | 4 |
|  | Primary producers (non-habitat) | 0.95 – 1.02 | 1.01 | 1 – 6 | 2.5 |
|  | Target (of fisheries) – habitat dependent | 0.62 – 1.30 | 0.99 | 5 – 28 | 15 |
|  | Target (of fisheries) – other | 0.57 – 1.40 | 1.01 | 5 – 34 | 15.5 |

Table S3: Summary of relative biomass response (biomass during event / biomass before first event) for temperate and tropical systems for major classes of functional groups for episodic ECEs.

| Ecosystem type | Functional group type | Range of relative biomass | Median of relative biomass |
| --- | --- | --- | --- |
| Temperate | Charismatic megafauna | 0.01 – 1.63 | 0.97 |
|  | Detritus | 0.00 – 1.40 | 0.12 |
|  | Fish – habitat dependent | 0.13 – 1.21 | 0.71 |
|  | Fish – other | 0.19 – 1.48 | 0.99 |
|  | Habitats | 0.20 – 1.29 | 0.93 |
|  | Invertebrates – habitat dependent | 0.01 – 1.09 | 0.67 |
|  | Invertebrates – other | 0.13 – 1.27 | 0.95 |
|  | Plankton | 0.00 – 1.22 | 0.99 |
|  | Primary producers (non-habitat) | 0.26 – 1.51 | 1.07 |
|  | Target (of fisheries) – habitat dependent | 0.24 – 1.28 | 0.76 |
|  | Target (of fisheries) – other | 0.52 – 2.07 | 0.97 |
| Tropical | Charismatic megafauna | 0.04 – 3.82 | 0.96 |
|  | Detritus | 0.58 – 1.06 | 0.99 |
|  | Fish – habitat dependent | 0.00 – 1.98 | 1.06 |
|  | Fish – other | 0.00 – 1.56 | 1.15 |
|  | Habitats | 0.00 – 1.10 | 0.75 |
|  | Invertebrates – habitat dependent | 0.00 – 1.29 | 0.92 |
|  | Invertebrates – other | 0.59 – 1.47 | 0.98 |
|  | Plankton | 0.86 – 1.17 | 0.99 |
|  | Primary producers (non-habitat) | 0.91 – 2.17 | 0.99 |
|  | Target (of fisheries) – habitat dependent | 0.00 – 1.02 | 0.03 |
|  | Target (of fisheries) – other | 0.00 – 1.75 | 1.10 |

Table S4: Summary of relative biomass response (biomass during event / biomass before event) for temperate and tropical systems for major classes of functional groups for ECE step change.

| Ecosystem type | Functional group type | Range of relative biomass | Median of relative biomass |
| --- | --- | --- | --- |
| Temperate | Charismatic megafauna | 0.08 – 1.57 | 0.99 |
|  | Detritus | 0.00 – 1.20 | 0.35 |
|  | Fish – habitat dependent | 0.09 – 1.22 | 0.84 |
|  | Fish – other | 0.61 – 1.98 | 1.01 |
|  | Habitats | 0.00 – 1.65 | 0.95 |
|  | Invertebrates – habitat dependent | 0.01 – 2.15 | 0.75 |
|  | Invertebrates – other | 0.28 – 2.11 | 0.97 |
|  | Plankton | 0.00 – 1.20 | 0.99 |
|  | Primary producers (non-habitat) | 0.00 - 1.43 | 1.10 |
|  | Target (of fisheries) – habitat dependent | 0.06 – 1.38 | 0.74 |
|  | Target (of fisheries) – other | 0.69 – 3.78 | 0.99 |
| Tropical | Charismatic megafauna | 0.00 – 1.47 | 0.96 |
|  | Detritus | 0.77 – 1.05 | 0.99 |
|  | Fish – habitat dependent | 0.78 – 2.02 | 1.02 |
|  | Fish – other | 0.00 – 1.55 | 1.01 |
|  | Habitats | 0.49 – 1.01 | 0.92 |
|  | Invertebrates – habitat dependent | 0.00 – 1.86 | 0.94 |
|  | Invertebrates – other | 0.21 – 1.24 | 0.99 |
|  | Plankton | 0.87 – 1.09 | 1.01 |
|  | Primary producers (non-habitat) | 0.95 – 1.12 | 1.01 |
|  | Target (of fisheries) – habitat dependent | 0.00 – 1.17 | 0.86 |
|  | Target (of fisheries) – other | 0.00 – 1.61 | 0.96 |


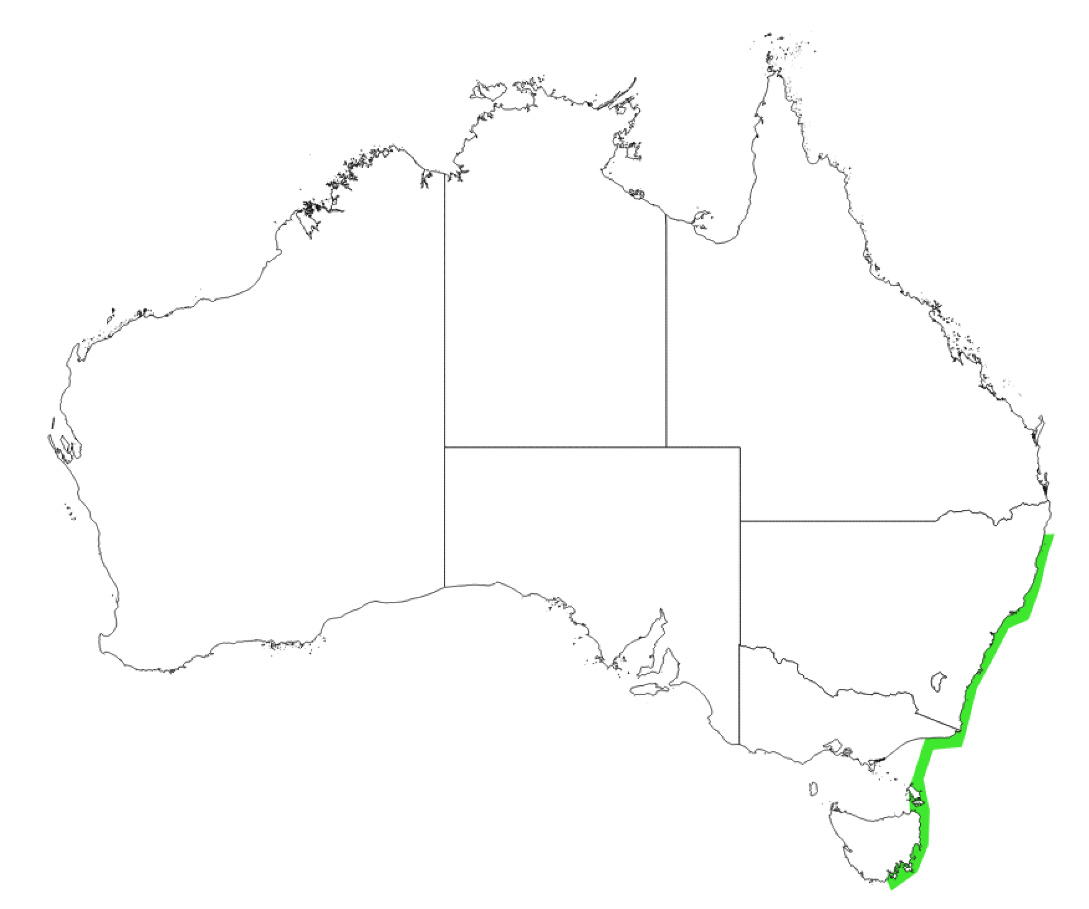


Figure S1: Map of the extent of the area where there has been gradual kelp loss.
